# Supplementary material for: Theoretical and Experimental Analyses of the Interfacial Mechanism of Dendrimer–Doxorubicin Complexes Formation
Source: PubMed Central journal article supplement (PMC11539063; doi:10.1021/acs.molpharmaceut.4c00941), 2024-10-22
Supplement: mp4c00941_si_001.pdf [file mp4c00941_si_001.pdf]

## Supplementary Information

# A Theoretical and Experimental Analysis of the Interfacial Mechanism of Dendrimer-Doxorubicin Complexes Formation

*Barbara Jachimska<sup>1\*</sup>, Magdalena Goncerz<sup>1</sup>, Paweł Wolski<sup>1</sup>, Callum Meldrum<sup>2</sup>, Łukasz  
Lustyk<sup>1</sup>, Tomasz Panczyk<sup>1</sup>,*

<sup>1</sup> Jerzy Haber Institute of Catalysis and Surface Chemistry Polish Academy of Sciences,  
Krakow, Poland

<sup>2</sup> Department of Chemical and Process Engineering, University of Strathclyde; 75 Montrose  
Street, Glasgow G1 1XJ, UK

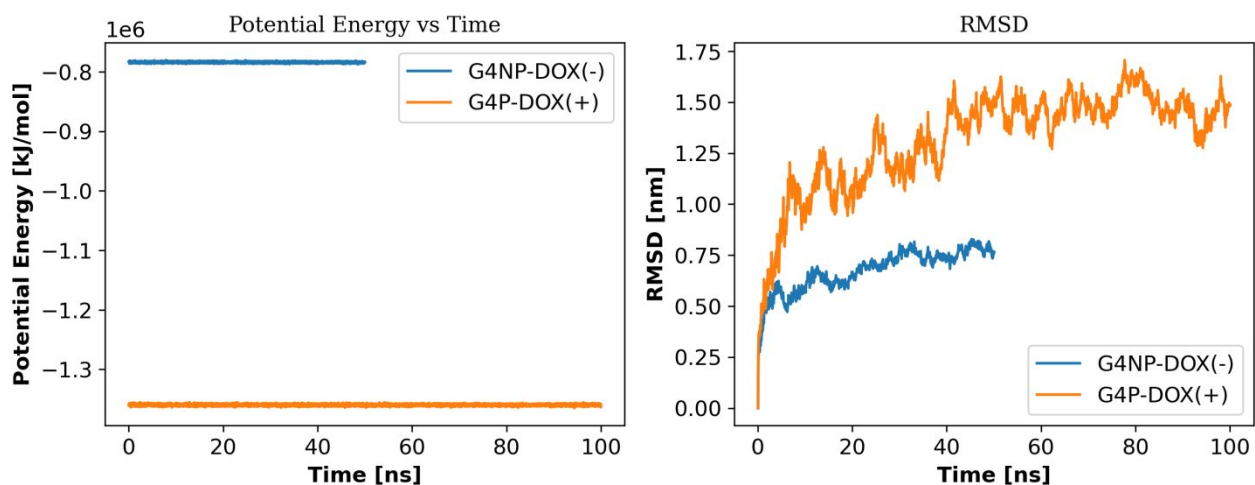

Figure S1. Change in the potential energy (left) and RMSD (right) values as a function of time. The RMSD value was calculated only for the dendrimer using the initial structure as a reference.
